# Supplementary material
Source: PubMed Central journal article supplement (PMC2687166)
Supplement: supp_191_10_3282__1.pdf [file supp_191_10_3282__1.pdf]

**Table 1. The list of primers used in this study**

| Primer name | Sequence                        | Length, bp | Location (5')         | Comment      |
|-------------|---------------------------------|------------|-----------------------|--------------|
| C203-124f   | AGGTATTGCAATTACTGGTTAATTG       | 26         | 559                   | PCR scanning |
| C203-129r   | TATAATTATAACCTAATAGCTTGACTG     | 28         | 1,268                 | PCR scanning |
| C203-101f   | TAGATGCCTTTAACTTAGCAAAAGAC      | 26         | 1,942                 | PCR scanning |
| C203-110r   | ATGTTCCATAATATCCTGTACCATTG      | 26         | 2,198                 | PCR scanning |
| C203-105f   | GTTATTTTAACTATAGTACAAATACCAG    | 28         | 2,857                 | PCR scanning |
| C203-105r   | CTAAAGTGTCATATAACCTCTTAAC       | 26         | 3,385                 | PCR scanning |
| C203-246f   | TTAAAATTCAAAACATAATAGGCTAGTC    | 28         | 4,058                 | PCR scanning |
| C203-263r   | AATGCTAAATAAAATTACATTAATAAATAAC | 30         | 4,544                 | PCR scanning |
| C203-100f   | GGATGTCTTAAAAATATACCATATAAAAG   | 28         | 5,537                 | PCR scanning |
| C203-264r   | ATAATTAAGAAAAATATCTTCAAGTTTTG   | 29         | 6,094                 | PCR scanning |
| C203-251f   | GGCTAAAGAGGGGGATAGGGCC          | 22         | 11,690                | PCR scanning |
| C203-265r   | TATATTTAAATTTTACATGTCTTTATATAG  | 30         | 12,115                | PCR scanning |
| C203-247f   | AAAGTTGAAAAGTGGACAACCTACTG      | 25         | 16,328                | PCR scanning |
| C203-266r   | TCTAGTTTGAGTTCTAACGGTATTTTC     | 27         | 16,722                | PCR scanning |
| C203-163f   | TAACTATGATACCTATGGTTATATTAC     | 28         | 20,371                | PCR scanning |
| C203-69r    | TACTATTACCTTGTCTATCTATAATTC     | 27         | 21,553                | PCR scanning |
| C203-252f   | AGGCTAAAAGGGGAGATAGGGCT         | 23         | 26,282                | PCR scanning |
| C203-267r   | GAAAGAAAAGAATAGAGAAAACGTGTTTC   | 26         | 26,807                | PCR scanning |
| C203-223f   | AATTAACTCAAATACTAAATACTAAAAG    | 29         | 28,717                | PCR scanning |
| C203-268r   | AATCTTTTAACTAATTCATAATATAAATC   | 30         | 29,340                | PCR scanning |
| C203-248f   | GTGCTTTTATATAGATATTGGTCATG      | 27         | 997 & 16,606 & 30,786 | PCR scanning |
| C203-269r   | TGTTCTATCTTTTTCTTTTTATAATTAAC   | 31         | 30,977                | PCR scanning |
| C203-249f   | ATGGAAAAGAATAATGTTATAGAAAATAC   | 28         | 33,457                | PCR scanning |
| C203-270r   | TCTATAGATAAAACACCTTTTTTTCATTC   | 28         | 34,094                | PCR scanning |
| C203-253f   | CCCTTATATTTAAATCTGCTTCCAG       | 26         | 40,909                | PCR scanning |
| C203-272r   | AGGGAGATCATATCCATATTTTCTC       | 25         | 41,375                | PCR scanning |
| C2-8f       | CTATAAGAGATGTAGAATTAATAGAG      | 27         | 44,259                | PCR scanning |
| C2.c-1.R2   | CGCAATCTAAATATAAAACGAG          | 22         | 45,021                | PCR scanning |
| C203-250f   | AAAGGGTGTATTGATAATATGCTTTAC     | 27         | 48,479                | PCR scanning |
| C203-20r    | AACTCTTTGACTTATCATAITTTCTTTC    | 27         | 48,886                | PCR scanning |
| C203-19f    | GGTTTTTATTTTGATGATGAACACAAC     | 27         | 50,525                | PCR scanning |
| C203-26f    | ATAATTGTTTGCATTATTGAATCATAC     | 28         | 51,181                | PCR scanning |
| C203-39f    | TTTGATATTTAACTGATAAAAAGTTTG     | 28         | 52,831                | PCR scanning |
| C203-55r    | CAATTTTAACTCTTTTATCAAGCATAG     | 27         | 53,230                | PCR scanning |
| C203-38f    | ATGTATATAGAACAGCATTAAGAAGCTG    | 27         | 55,442                | PCR scanning |
| C203-77r    | CATAAATATCAAGGCTTAAATTAITTC     | 28         | 56,935                | PCR scanning |
| C203-72f    | TTAGATTTAATTGAAGTTGAATATGAAC    | 28         | 61,243                | PCR scanning |
| C203-140r   | TAACTATCTGCAAACTCAACTGTAAG      | 26         | 63,035                | PCR scanning |
| C203-88f    | TAGTTAATTATATTGGAGAGCCTATAC     | 27         | 64,098                | PCR scanning |

|            |                                |    |                 |                                                |
|------------|--------------------------------|----|-----------------|------------------------------------------------|
| C203-124r  | TATATCAAATACAGACCAAACATTTAG    | 27 | 65,629          | PCR scanning                                   |
| C203-115f  | GCAAAGTTATGACTTTACAGGAAAAG     | 26 | 67,696          | PCR scanning                                   |
| C203-112r  | CCAATTTTGTGTCATATGTTTATTTCC    | 27 | 68,287          | PCR scanning                                   |
| C203-136f  | CAATCAACAAGAACAAGAAATTCATG     | 27 | 72,622          | PCR scanning                                   |
| C203-190r  | ATAGTAAGAGATGCATAACAGCCTTTG    | 25 | 73,427          | PCR scanning                                   |
| C203-167f  | CCATTAATGCAAACATTAATAATCCTG    | 27 | 78,406          | PCR scanning                                   |
| C203-200r  | TACTTTATATGAGTTAGCTAAATTTATG   | 28 | 79,289          | PCR scanning                                   |
| C203-211f  | GTACATTTCTATTAATAATATGGCAC     | 27 | 86,274          | PCR scanning                                   |
| C203-222r  | ATAACTACTTTTAAATAAATCTAATGTG   | 29 | 87,038          | PCR scanning                                   |
| C203-199f  | ACAAGACTTGTATTTCCACAAGTTAC     | 26 | 89,650          | PCR scanning                                   |
| C203-228r  | TCTATATGAATTTTGGAAACACTTAAC    | 27 | 90,615          | PCR scanning                                   |
| C203-208f  | AATTATGGTATAGCAGAAATATTTGTG    | 28 | 92,088          | PCR scanning                                   |
| C203-220r  | TTATGTTTAAATAGTATGGCAGATATAG   | 27 | 93,057          | PCR scanning                                   |
| C203-193f  | GGTACAGTATTAGCACATGATTTAAC     | 26 | 95,684          | PCR scanning                                   |
| C203-195r  | AGGATGTAGTTTTAAATACATTCCAG     | 27 | 96,542          | PCR scanning                                   |
| C203-177f  | TGACTCCTTTAAAGATAAATGTAGTAC    | 27 | 100,924         | PCR scanning                                   |
| C203-184r  | TGACGTAAGTCTTATTTTATTACACTC    | 27 | 101,249         | PCR scanning                                   |
| C203-160f  | AACCTAAATTAATCATAAGATAAACTC    | 28 | 102,758         | PCR scanning                                   |
| C203-262r  | ATAAAAGCTATGAGAACTTACTTAAAG    | 27 | 103,325         | PCR scanning                                   |
| C203-218f  | TTAATATATTAGTTATTTTCATTATATCAG | 30 | 38,702          | upstream of C2 toxin gene*                     |
| C2.c-I.R4  | ATAACTGGTATACTCTCATCG          | 21 | 44,406          | upstream of C2 toxin gene*, Walking primer**   |
| C2.c-I.F7  | TAAATCTATTGCATGTACATAAATAAC    | 28 | 43,784          | C2 toxin gene*, Walking primer**               |
| C203-21r   | CAATCCCTATGAATAGAATATCATATC    | 27 | 48,472          | C2 toxin gene*, Walking primer**               |
| C2.c-II.F8 | TAACTTTAAACTCTTTAATAACC        | 23 | 47,442          | downstream of C2 toxin gene*, Walking primer** |
| C203-56r   | TCAAGATCAACAACATAAAGTTTATATC   | 28 | 52,775          | downstream of C2 toxin gene*                   |
| C203-214f  | TATTACTATGGTATTATAAAATGGAAAG   | 28 | 39,311          | Walking primer**                               |
| C203-215f  | ACTGAATCCTTTAGCAAAGATGAATC     | 26 | 39,844          | Walking primer**                               |
| C203-30f   | TGCAAAAACATTTTTTATTAGCTAGTG    | 27 | 40,425          | Walking primer**                               |
| C203-147f  | CCATAAGCTTAAACTTTAAAGCATTAC    | 27 | 11,887 & 41,054 | Walking primer**                               |
| C203-17f   | AAAATACATTTGAAATTAAGAAAGGAAC   | 28 | 41,688          | Walking primer**                               |
| C203-9f    | CTACAAGACAATACTTAGCAAGAAAC     | 26 | 42,227          | Walking primer**                               |
| C203-10f   | TATAGGTCAGAATCTTATACTCTTG      | 26 | 42,510          | Walking primer**                               |
| C203-15f   | ATATATTATTCTTTAAGGTGATATTATG   | 29 | 43,056          | Walking primer**                               |
| C2.c-I.F3  | CATCGATGAGAGTATAACCAG          | 20 | 44,383          | Walking primer**                               |
| C2-7f      | TCATTTTCTAGTACTTCTCTTAAATCC    | 27 | 44,951          | Walking primer**                               |
| C2.c-II.F2 | AGGATATTAATCAATCTTAGG          | 22 | 45,611          | Walking primer**                               |
| C2-5f      | TCTGTAAGTATGGTAGCAAGAGATC      | 25 | 46,210          | Walking primer**                               |
| C2.c-II.F6 | CCAACGGTAATTTAGTAACTG          | 21 | 46,853          | Walking primer**                               |
| C2-1f      | CAAATTCATGTGTAACCTTTAGTTTTAC   | 27 | 48,214          | Walking primer**                               |
| C203-2f    | ACGATAATTGCTACTGAAGTAAGTAG     | 26 | 48,677          | Walking primer**                               |
| C203-3f    | CTATTAAGTATATTTCTTAAATTTGTATAC | 30 | 49,133          | Walking primer**                               |
| C203-4f    | TTTTTCACTATAACATAATTTCTTGTTG   | 28 | 49,468          | Walking primer**                               |
| C203-7f    | ACCAACAGTTAACCTTTAATCATAG      | 27 | 49,885          | Walking primer**                               |
| C203-19f   | GGTTTTTATTTTGATGATGAACACAAC    | 27 | 50,525          | Walking primer**                               |

|            |                                |    |        |                  |
|------------|--------------------------------|----|--------|------------------|
| C203-25r   | ATTATGATTTTCAATTTAACAAGGAAAC   | 28 | 51,081 | Walking primer** |
| C203-11f   | GAATTCCTTCTAATCATAGGATTTTCTG   | 27 | 51,840 | Walking primer** |
| C203-27f   | CAATTTGAAGTTTTTATCATAGAATCAC   | 28 | 52,154 | Walking primer** |
| C203-34r   | GATAAAAAGCTACCTTATTTTAGATAAC   | 28 | 52,320 | Walking primer** |
| C203-33r   | TTACAATACAATGTATACTTCAATATAC   | 28 | 52,088 | Walking primer** |
| C203-6r    | TATTACATCTGTATTATATCATGAGTG    | 27 | 51,456 | Walking primer** |
| C203-27r   | AGTTCCTTTTATGCAGGTAATATTAC     | 26 | 50,820 | Walking primer** |
| C203-9r    | AATTCCTCATATGATAAAGTACAAGTC    | 27 | 50,379 | Walking primer** |
| C203-22r   | TAAAGGATTCTAACTATGCCTAAATAC    | 27 | 50,040 | Walking primer** |
| C203-4r    | TACTTTGTTTGGTGAAACATTTACTAG    | 27 | 49,431 | Walking primer** |
| C203-271r  | TAAACCTTCTATAATTTTTATGTATTTATC | 30 | 49,084 | Walking primer** |
| C2.c-II.R1 | ACATAAAAATACCCATGAAGTAAGC      | 26 | 47,756 | Walking primer** |
| C2.c-II.R3 | AAAATCATTATTTGTATTACTATC       | 24 | 47,145 | Walking primer** |
| C2.c-II.R5 | AGTATTATAATATCTAATATTAGG       | 24 | 46,572 | Walking primer** |
| C2.c-II.R7 | TTTAGATTTCTCATTGTATTAC         | 23 | 45,960 | Walking primer** |
| C2-7r      | ACATAAATACACTCTCCTAATTTTATC    | 27 | 45,463 | Walking primer** |
| C2.c-I.R2  | CGCAATCTAAATATAAAACGAG         | 22 | 45,021 | Walking primer** |
| C2-6r      | GTTATGATAATATAATGCATTATACGAC   | 28 | 43,902 | Walking primer** |
| C203-8r    | GGTAGACCTTTTACATCATAACAAAC     | 26 | 43,380 | Walking primer** |
| C203-14r   | CAGATATAACATCAGAATCATTAGAAG    | 27 | 42,854 | Walking primer** |
| C203-15r   | ATACAATTATTATGTTTACATTGAATAC   | 28 | 42,464 | Walking primer** |
| C203-16r   | ACTTTCATCTTCAGACTTACCTTTAG     | 26 | 42,057 | Walking primer** |
| C203-17r   | TATAAATCTTCATTTAATAATACACTTAG  | 29 | 41,649 | Walking primer** |
| C203-18r   | ATAACTCTATCATATTTAACGTCTAAAG   | 28 | 41,318 | Walking primer** |
| C203-26r   | ATAAGCTGTTACTTTAAAGCTTAAGTG    | 27 | 40,583 | Walking primer** |
| C203-32r   | TTAAATATTGCAGTAACTTGATTTTAG    | 28 | 40,103 | Walking primer** |
| C203-24r   | TGATTGTATAAGTGAACCTTCTAAAATC   | 27 | 39,684 | Walking primer** |
| C203-234r  | TACGTATTCAATTCTCTTCAAAATAC     | 27 | 39,040 | Walking primer** |

\*PCR primers for PCR products of the C2 toxin gene and C2 toxin gene-flanking region of C-ST, C-468, and D-1873.

\*\*Walking primers for sequencing the C2 toxin gene-flanking region of C-ST, C-468, and D-1873.
