# Supplementary material
Source: PubMed Central journal article supplement (PMC2687166)
Supplement: supp_191_10_3282__2.pdf [file supp_191_10_3282__2.pdf]

**Table 2. ORFs identified in the pC2C203U28**

| ORF    | Position (start) | (stop) | Strand | Length (aa) | Product                                       | Note                                                                                                                                                                                                                                                                                                          |
|--------|------------------|--------|--------|-------------|-----------------------------------------------|---------------------------------------------------------------------------------------------------------------------------------------------------------------------------------------------------------------------------------------------------------------------------------------------------------------|
| C2P001 | 101              | 1,585  | +      | 494         | putative replication protein                  | Similar to putative replication protein[Clostridium tetani E88](gil28373132 ref NP_783730.1) 57.8% identity in overlap 483aa                                                                                                                                                                                  |
| C2P002 | 1,833            | 2,573  | +      | 246         | putative two-component response regulator     | Similar to VirR protein[Clostridium perfringens](gil86559596 ref YP_473417.1) 26.8% identity in overlap 239aa                                                                                                                                                                                                 |
| C2P003 | 2,599            | 3,849  | +      | 416         | putative two-component response regulator     | Similar to VirS protein[Clostridium perfringens](gil86559597 ref YP_473418.1) 24.8% identity in overlap 447aa                                                                                                                                                                                                 |
| C2P004 | 4,543            | 4,058  | -      | 161         | putative agrB                                 | Weakly similar to accessory gene regulator B[Staphylococcus aureus RF122](gil82751638 ref YP_417379.1) 27.6% identity in overlap 163aa. Probably truncated C-terminus                                                                                                                                         |
| C2P005 | 5,243            | 6,130  | +      | 295         | putative ABC transporter, ATP-binding protein | Similar to ABC transporter ATP-binding protein[Clostridium tetani E88](gil28210375 ref NP_781319.1) 43.1% identity in overlap 297aa                                                                                                                                                                           |
| C2P006 | 6,114            | 7,355  | +      | 413         | conserved hypothetical protein                | Similar to hypothetical protein NT01CX_1309[Clostridium novyi NT](gil118444312 ref YP_877392.1) 29.3% identity in overlap 410aa                                                                                                                                                                               |
| C2P007 | 7,382            | 7,621  | +      | 79          | hypothetical protein                          |                                                                                                                                                                                                                                                                                                               |
| C2P008 | 7,705            | 7,944  | +      | 79          | hypothetical protein                          |                                                                                                                                                                                                                                                                                                               |
| C2P009 | 8,215            | 7,997  | -      | 72          | conserved hypothetical protein                | Similar to hypothetical protein NT01CX_0737[Clostridium novyi NT](gil118445123 ref YP_879203.1) 32.4% identity in overlap 71aa                                                                                                                                                                                |
| C2P010 | 8,444            | 8,229  | -      | 71          | conserved hypothetical protein                | Similar to hypothetical protein NT01CX_0738[Clostridium novyi NT](gil118444037 ref YP_879204.1) 37.5% identity in overlap 72aa                                                                                                                                                                                |
| C2P011 | 8,828            | 8,511  | -      | 105         | hypothetical protein                          | N-terminus is similar to middle of putative N-acetylmuramoyl-L-alanine amidase[Clostridium tetani E88](gil28373183 ref NP_783826.1) 56.9% identity in overlap 58aa. C-terminus is similar to hypothetical protein pE88_03[Clostridium tetani E88](gil28373134 ref NP_783732.1) 58.0% identity in overlap 50aa |
| C2P012 | 8,868            | 9,080  | +      | 70          | hypothetical protein                          |                                                                                                                                                                                                                                                                                                               |
| C2P013 | 9,328            | 9,089  | -      | 79          | putative UviB                                 | Similar to uviB homologous protein[Clostridium tetani E88](gil28373135 ref NP_783733.1) 67.6% identity in overlap 74aa                                                                                                                                                                                        |

|        |        |        |   |     |                                               |                                                                                                                                                                                                                                                                                                                      |
|--------|--------|--------|---|-----|-----------------------------------------------|----------------------------------------------------------------------------------------------------------------------------------------------------------------------------------------------------------------------------------------------------------------------------------------------------------------------|
| C2P014 | 11,278 | 10,583 | - | 231 | conserved hypothetical protein                | Similar to hypothetical protein NT01CX_0694[Clostridium novyi NT](gil118443237reflYYP_879160.1)37.2% identity in overlap 226aa                                                                                                                                                                                       |
| C2P015 | 11,670 | 12,110 | + | 146 | putative RNA polymerase sigma factor          | Similar to putative RNA polymerase sigma factor[Clostridium tetani E88](gil28373140reflNP_783738.1)53.9% identity in overlap 141aa, also similar to putative RNA polymerase sigma factor[Clostridium tetani E88](gil28373141reflNP_783739.1)32.2% identity in overlap 149aa. Probably truncated C-terminus           |
| C2P016 | 12,183 | 13,496 | + | 437 | conserved hypothetical protein                | Similar to hypothetical protein CLC_1691[Clostridium botulinum A str. Hall](gil153935200reflYYP_001387547.1)31.3% identity in overlap 291aa                                                                                                                                                                          |
| C2P017 | 13,999 | 14,742 | + | 247 | conserved hypothetical protein                | Similar to membrane-spanning protein[Clostridium tetani E88](gil28373170reflNP_783813.1)29.5% identity in overlap 251aa                                                                                                                                                                                              |
| C2P018 | 14,792 | 15,511 | + | 239 | hypothetical protein                          |                                                                                                                                                                                                                                                                                                                      |
| C2P019 | 15,527 | 16,174 | + | 215 | putative ABC transporter, ATP-binding protein | Similar to ABC transporter ATP-binding protein[Clostridium tetani E88](gil28373165reflNP_783765.1)47.3% identity in overlap 201aa                                                                                                                                                                                    |
| C2P020 | 16,325 | 16,747 | + | 140 | putative replication protein                  | Similar to putative replication protein[Clostridium tetani E88](gil28373173reflNP_783816.1)57.5% identity in overlap 127aa. Probably truncated N- and C-terminus                                                                                                                                                     |
| C2P021 | 17,217 | 17,918 | + | 233 | conserved hypothetical protein                | Weakly similar to hypothetical protein CAC0207[Clostridium acetobutylicum ATCC 824](gil15893500reflNP_346849.1)25.5% identity in overlap 204aa                                                                                                                                                                       |
| C2P022 | 18,185 | 17,952 | - | 77  | conserved hypothetical protein                | Similar to C-terminus of putative phage lysozyme[Clostridium botulinum B str. Eklund 17B](gil187934460reflYYP_001887135.1)50.7% identity in overlap 77aa. Probably truncated N-terminus                                                                                                                              |
| C2P023 | 18,323 | 18,652 | + | 109 | hypothetical protein                          |                                                                                                                                                                                                                                                                                                                      |
| C2P024 | 19,455 | 18,730 | - | 241 | conserved hypothetical protein                | Similar to hypothetical protein NT01CX_0694[Clostridium novyi NT](gil118443237reflYYP_879160.1)62.5% identity in overlap 237aa                                                                                                                                                                                       |
| C2P025 | 20,353 | 21,870 | + | 505 | conserved hypothetical protein                | Weakly similar to hypothetical protein CKL_3069[Clostridium kluyveri DSM 555](gil153955683reflYYP_001396448.1)22.3% identity in overlap 476aa                                                                                                                                                                        |
| C2P026 | 22,505 | 21,882 | - | 207 | conserved hypothetical protein                | N-terminus is similar to cell wall biogenesis enzyme(N-terminal domain related to N-Acetylmuramoyl-L-alanine amidase and C-terminal domain related to L-alanoyl-D-glutamate peptidase); peptidoglycan-binding domain[Clostridium acetobutylicum ATCC 824](gil15894296reflNP_347645.1)36.4% identity in overlap 110aa |

|        |        |        |   |     |                                      |                                                                                                                                                                                                                                                                                              |
|--------|--------|--------|---|-----|--------------------------------------|----------------------------------------------------------------------------------------------------------------------------------------------------------------------------------------------------------------------------------------------------------------------------------------------|
| C2P027 | 22,704 | 24,281 | + | 525 | conserved hypothetical protein       | N-terminus is similar to hypothetical protein NT01CX_1069[Clostridium novyi NT](gil118444156 reflYYP_877153.1)34.4% identity in overlap 294aa, C-terminus is similar to hypothetical protein NT01CX_1069[Clostridium novyi NT](gil118444156 reflYYP_877153.1)30.4% identity in overlap 306aa |
| C2P028 | 24,438 | 24,893 | + | 151 | putative transposase OrfA            | Similar probable transposase[Clostridium perfringens str. 13](gil18309121 reflNP_561055.1)73.8% identity in overlap 149aa                                                                                                                                                                    |
| C2P029 | 25,800 | 25,000 | - | 266 | conserved hypothetical protein       | N-terminus is similar to gamma-D-glutamyl-L-diamino acid endopeptidase I[Clostridium tetani E88](gil28210330 reflNP_781274.1)32.8% identity in overlap 131aa                                                                                                                                 |
| C2P030 | 26,263 | 26,811 | + | 182 | putative RNA polymerase sigma factor | Similar to putative RNA polymerase sigma factor[Clostridium tetani E88](gil28373140 reflNP_783738.1)46.8% identity in overlap 173aa, also to putative RNA polymerase sigma factor[Clostridium tetani E88](gil28373141 reflNP_783739.1)30.2% identity in overlap 179 aa                       |
| C2P031 | 26,986 | 27,441 | + | 151 | putative replication protein         | Weakly similar to N-terminus of initiator RepB protein family[Clostridium perfringens SM101](gil110803274 reflYYP_697644.1)20.3% identity in overlap 153aa                                                                                                                                   |
| C2P032 | 27,419 | 27,892 | + | 157 | putative replication protein         | Similar to C-terminus of initiator RepB protein family[Clostridium perfringens SM101](gil110803274 reflYYP_697644.1)34.8% identity in overlap 118aa                                                                                                                                          |
| C2P033 | 27,941 | 28,402 | + | 153 | conserved hypothetical protein       | Similar to hypothetical protein NT01CX_1173[Clostridium novyi NT](gil118444583 reflYYP_877256.1)46.7% identity in overlap 135aa                                                                                                                                                              |
| C2P034 | 28,588 | 29,349 | + | 253 | putative ParA protein                | Similar to chromosome partitioning protein parA[Clostridium tetani E88](gil28209873 reflNP_780817.1)33.6% identity in overlap 253aa                                                                                                                                                          |
| C2P035 | 29,469 | 29,747 | + | 92  | conserved hypothetical protein       | Similar to hypothetical protein CA_P0176[Clostridium acetobutylicum ATCC 824](gil15004879 reflNP_149339.1)43.5% identity in overlap 92aa                                                                                                                                                     |
| C2P036 | 30,050 | 30,598 | + | 182 | hypothetical protein                 |                                                                                                                                                                                                                                                                                              |
| C2P037 | 30,583 | 30,750 | + | 55  | hypothetical protein                 |                                                                                                                                                                                                                                                                                              |
| C2P038 | 30,784 | 31,005 | + | 73  | Putative replication protein         | Similar to putative replication protein[Clostridium tetani E88](gil28373173 reflNP_783816.1)66.7% identity in overlap 30aa. Probably truncated N- and C-terminus                                                                                                                             |
| C2P039 | 31,104 | 31,877 | + | 257 | conserved hypothetical protein       | Similar to membrane-spanning protein[Clostridium tetani E88](gil28373170 reflNP_783813.1)33.9% identity in overlap 254 aa                                                                                                                                                                    |
| C2P040 | 31,855 | 32,682 | + | 275 | conserved hypothetical protein       | Similar to hypothetical protein CPR_0051[Clostridium perfringens SM101](gil110802027 reflYYP_697393.1)39.8% identity in overlap 269aa                                                                                                                                                        |

|        |        |        |   |     |                                               |                                                                                                                                                                                                                                                                                          |
|--------|--------|--------|---|-----|-----------------------------------------------|------------------------------------------------------------------------------------------------------------------------------------------------------------------------------------------------------------------------------------------------------------------------------------------|
| C2P041 | 32,679 | 33,434 | + | 251 | conserved hypothetical protein                | Similar to hypothetical protein CPR_0052[Clostridium perfringens SM101](gil110802620 ref YP_697394.1 )40.6% identity in overlap 249aa                                                                                                                                                    |
| C2P042 | 33,457 | 34,101 | + | 214 | putative ABC transporter, ATP-binding protein | Similar to ABC transporter ATP-binding protein[Clostridium tetani E88](gil28373165 ref NP_783765.1 )51.9% identity in overlap 208aa                                                                                                                                                      |
| C2P043 | 34,638 | 34,471 | - | 55  | hypothetical protein                          |                                                                                                                                                                                                                                                                                          |
| C2P044 | 34,658 | 34,960 | + | 100 | hypothetical protein                          |                                                                                                                                                                                                                                                                                          |
| C2P045 | 35,426 | 35,214 | - | 70  | hypothetical protein                          |                                                                                                                                                                                                                                                                                          |
| C2P046 | 36,100 | 36,846 | + | 248 | conserved hypothetical protein                | Similar to hypothetical protein CTC00614[Clostridium tetani E88](gil28210346 ref NP_781290.1 )38.2% identity in overlap 246aa<br>Similar to C-terminus of transposase[Clostridium tetani E88](gil28210547 ref NP_781491.1 )51.9% identity in overlap 52aa. Probably truncated N-terminus |
| C2P047 | 37,357 | 37,515 | + | 52  | putative transposase OrfB                     |                                                                                                                                                                                                                                                                                          |
| C2P048 | 37,602 | 38,006 | + | 134 | hypothetical protein                          |                                                                                                                                                                                                                                                                                          |
| C2P049 | 38,747 | 38,370 | - | 125 | hypothetical protein                          |                                                                                                                                                                                                                                                                                          |
| C2P050 | 38,993 | 39,463 | + | 156 | hypothetical protein                          |                                                                                                                                                                                                                                                                                          |
| C2P051 | 39,583 | 40,449 | + | 288 | hypothetical protein                          |                                                                                                                                                                                                                                                                                          |
| C2P052 | 40,837 | 41,379 | + | 180 | putative RNA polymerase sigma factor          | Similar to putative RNA polymerase sigma factor[Clostridium tetani E88](gil28373140 ref NP_783738.1 )47.7% identity in overlap 172aa, also similar to putative RNA polymerase sigma factor[Clostridium tetani E88](gil28373141 ref NP_783739.1 )28.7% identity in overlap 181aa          |
| C2P053 | 41,573 | 41,905 | + | 110 | putative transcriptional regulator            | Similar to transcriptional regulator, PadR family[Clostridium perfringens SM101](gil110801733 ref YP_697976.1 )46.1% identity in overlap 102aa                                                                                                                                           |
| C2P054 | 41,908 | 42,654 | + | 248 | hypothetical protein                          | N terminus is similar to hypothetical protein CPF_0700[Clostridium perfringens ATCC 13124](gil110800270 ref YP_695152.1 )44.7% identity in overlap 94 aa                                                                                                                                 |
| C2P055 | 43,082 | 43,414 | + | 110 | hypothetical protein                          |                                                                                                                                                                                                                                                                                          |
| C2P056 | 43,919 | 45,214 | + | 431 | C2 toxin, component I                         | Identical to C2 toxin(component-I)[Clostridium botulinum](gil3478671 ref BAA32536.1 )                                                                                                                                                                                                    |
| C2P057 | 45,460 | 47,625 | + | 721 | C2 toxin, component II                        | Identical to C2 toxin(component-II)[Clostridium botulinum](gil3478672 ref BAA32537.1 )                                                                                                                                                                                                   |
| C2P058 | 48,497 | 49,084 | + | 195 | putative resolvase                            | Similar to resolvase[Clostridium perfringens SM101](gil110804008 ref YP_699911.1 )36.8% identity in overlap 193 aa                                                                                                                                                                       |

|        |        |        |   |     |                                                                               |                                                                                                                                                                                                                                                                                                                                       |
|--------|--------|--------|---|-----|-------------------------------------------------------------------------------|---------------------------------------------------------------------------------------------------------------------------------------------------------------------------------------------------------------------------------------------------------------------------------------------------------------------------------------|
| C2P059 | 49,541 | 49,206 | - | 111 | hypothetical protein                                                          |                                                                                                                                                                                                                                                                                                                                       |
| C2P060 | 49,909 | 49,577 | - | 110 | hypothetical protein                                                          |                                                                                                                                                                                                                                                                                                                                       |
| C2P061 | 50,213 | 51,259 | + | 348 | putative replication protein                                                  | Similar to initiator RepB protein family[Clostridium perfringens SM101](gil110803274 reflYYP_697644.1 )27.9% identity in overlap 280aa                                                                                                                                                                                                |
| C2P062 | 51,692 | 51,351 | - | 113 | hypothetical protein                                                          |                                                                                                                                                                                                                                                                                                                                       |
| C2P063 | 52,173 | 51,832 | - | 113 | hypothetical protein                                                          |                                                                                                                                                                                                                                                                                                                                       |
| C2P064 | 52,657 | 53,427 | + | 256 | putative transcriptional regurator                                            | Similar to chromosome partitioning protein; transcriptional regulator[Bacillus subtilis subsp. subtilis str. 168](gil16081149 reflNP_391977.1 )39.2% identity in overlap 250aa                                                                                                                                                        |
| C2P065 | 53,417 | 53,740 | + | 107 | hypothetical protein                                                          |                                                                                                                                                                                                                                                                                                                                       |
| C2P066 | 54,015 | 54,959 | + | 314 | conserved hypothetical protein                                                | Similar to hypothetical protein MAE_39620[Microcystis aeruginosa NIES-843](gil166366703 reflYYP_001658976.1 )29.9% identity in overlap 291aa                                                                                                                                                                                          |
| C2P067 | 55,267 | 57,033 | + | 588 | putative transcriptional regurator                                            | Similar to signal-transduction and transcriptional-control protein[Clostridium tetani E88](gil28209846 reflNP_780790.1 )59.2% identity in overlap 585aa                                                                                                                                                                               |
| C2P068 | 57,231 | 58,523 | + | 430 | putative guanine deaminase                                                    | Similar to amidohydrolase[Thermosipho melanesiensis BI429](gil150020028 reflYYP_001305382.1 )51.8% identity in overlap 427aa, also weakly similar to probable guanine deaminase[Thermococcus kodakarensis KOD1](gil57160150 reflBAD86080)28.0% identity in overlap 404aa                                                              |
| C2P069 | 58,550 | 59,638 | + | 362 | putative dihydroorotate dehydrogenase family protein                          | Similar to dihydroorotate dehydrogenase family protein[Thermosipho melanesiensis BI429](gil150020029 reflYYP_001305383.1 )61.8% identity in overlap 356aa                                                                                                                                                                             |
| C2P070 | 59,658 | 60,443 | + | 261 | putative xanthine dehydrogenase, FAD binding subunit                          | Similar to putative FAD-binding subunit of oxidoreductase[Clostridium difficile 630](gil126699718 reflYYP_001088615.1 )42.3% identity in overlap 260aa, also similar to xanthine dehydrogenase[Bacillus subtilis subsp. subtilis str. 168](gil16080302 reflNP_391129.1 )24.4% identity in overlap 238aa                               |
| C2P071 | 60,443 | 60,892 | + | 149 | putative xanthine dehydrogenase family protein, iron-sulfur-binding subunit   | Similar to xanthine dehydrogenase family protein, iron-sulfur-binding subunit[Clostridium botulinum B1 str. Okra](gil170756562 reflYYP_001779908.1 )43.3% identity in overlap 150aa, also similar to xanthine dehydrogenase[Bacillus subtilis subsp. subtilis str. 168](gil16080300 reflNP_391127.1 )34.7% identity in overlap 150aa  |
| C2P072 | 60,901 | 63,204 | + | 767 | putative xanthine dehydrogenase family protein, molybdopterin-binding subunit | Similar to xanthine dehydrogenase family protein, molybdopterin-binding subunit[Clostridium botulinum B1 str. Okra](gil17075646 reflYYP_001780908.1 )34.4% identity in overlap 777aa, also similar to xanthine dehydrogenase[Bacillus subtilis subsp. subtilis str. 168](gil16080301 reflNP_391128.1 )27.2% identity in overlap 765aa |

|        |        |        |   |     |                                                                               |                                                                                                                                                                                                                                                                                                                                                      |
|--------|--------|--------|---|-----|-------------------------------------------------------------------------------|------------------------------------------------------------------------------------------------------------------------------------------------------------------------------------------------------------------------------------------------------------------------------------------------------------------------------------------------------|
| C2P073 | 63,245 | 63,829 | + | 194 | putative molybdopterin-guanine dinucleotide synthase                          | Similar to molybdopterin-guanine dinucleotide biosynthesis protein A[Clostridium tetani E88](gil28212056 ref NP_783000.1 )51.3% identity in overlap 195aa. N-terminus is similar to N-terminus of xanthine dehydrogenase[Bacillus subtilis subsp. subtilis str. 168](gil16080303 ref NP_391130.1 )30.5% identity in overlap 59aa                     |
| C2P074 | 63,839 | 65,980 | + | 713 | putative xanthine dehydrogenase family protein, molybdopterin-binding subunit | Similar to xanthine dehydrogenase family protein, molybdopterin-binding subunit[Clostridium botulinum A3 str. Loch Maree](gil170759696 ref YP_001788204.1 )30.9% identity in overlap 712aa. N-terminus is similar to xanthine dehydrogenase[Bacillus subtilis subsp. subtilis str. 168](gil16080301 ref NP_391128.1 )31.4% identity in overlap 519aa |
| C2P075 | 65,967 | 66,446 | + | 159 | putative xanthine dehydrogenase family protein, iron-sulfur-binding subunit   | Similar to xanthine dehydrogenase family protein, iron-sulfur binding subunit[Clostridium botulinum A3 str. Loch Maree](gil170758476 ref YP_001786676.1 )41.5% identity in overlap 147 aa, also similar to xanthine dehydrogenase[Bacillus subtilis subsp. subtilis str. 168](gil16080300 ref NP_391127 )42.1% identity in overlap 159aa             |
| C2P076 | 66,440 | 67,279 | + | 279 | putative xanthine dehydrogenase, FAD-binding subunit                          | Similar to medium FAD-binding subunit of molybdenum enzyme[Clostridium botulinum B str. Eklund 17B](gil187935032 ref YP_001887512.1 )32.7% identity in overlap 275aa, also similar to xanthine dehydrogenase[Bacillus subtilis subsp. subtilis str. 168](gil16080302 ref NP_391129.1 )23.3% identity in overlap 193aa                                |
| C2P077 | 67,475 | 68,293 | + | 272 | putative xanthine dehydrogenase accessory factor                              | Similar to putative xanthine dehydrogenase accessory factor[Clostridium botulinum A3 str. Loch Maree](gil170759749 ref YP_001788216.1 )31.0% identity in overlap 258aa. C-terminus is similar to C-terminus of xanthine dehydrogenase[Bacillus subtilis subsp. subtilis str. 168](gil16080304 ref NP_391131.1 )25.2% identity in overlap 147aa       |
| C2P078 | 68,515 | 69,726 | + | 403 | putative diaminopropionate ammonia-lyase                                      | Similar to diaminopropionate ammonia-lyase[Clostridium tetani E88](gil28209845 ref NP_780789.1 )62.3% identity in overlap 401aa                                                                                                                                                                                                                      |
| C2P079 | 69,779 | 71,167 | + | 462 | putative dihydropyrimidinase                                                  | Similar to dihydropyrimidinase[Clostridium tetani E88](gil28211428 ref NP_782372.1 )50.7% identity in overlap 456aa                                                                                                                                                                                                                                  |
| C2P080 | 71,195 | 72,415 | + | 406 | putative peptidase                                                            | Similar to peptidase, M20/M25/M40 family[Clostridium botulinum A str. Hall](gil153937611 ref YP_001388614.1 )85.4% identity in overlap 404aa                                                                                                                                                                                                         |
| C2P081 | 72,457 | 73,440 | + | 327 | putative ornithine carbamoyltransferase                                       | Similar to aspartate/ornithine carbamoyltransferase family protein[Clostridium botulinum A str. Hall](gil153936984 ref YP_001388617.1 )35.2% identity in overlap 358aa                                                                                                                                                                               |
| C2P082 | 73,853 | 73,521 | - | 110 | hypothetical protein                                                          |                                                                                                                                                                                                                                                                                                                                                      |
| C2P083 | 74,661 | 75,065 | + | 134 | hypothetical protein                                                          |                                                                                                                                                                                                                                                                                                                                                      |
| C2P084 | 75,449 | 75,144 | - | 101 | hypothetical protein                                                          |                                                                                                                                                                                                                                                                                                                                                      |
| C2P085 | 75,608 | 76,006 | + | 132 | hypothetical protein                                                          |                                                                                                                                                                                                                                                                                                                                                      |

|        |        |        |   |     |                                                        |                                                                                                                                                                                                                                                                                                                       |
|--------|--------|--------|---|-----|--------------------------------------------------------|-----------------------------------------------------------------------------------------------------------------------------------------------------------------------------------------------------------------------------------------------------------------------------------------------------------------------|
| C2P086 | 76,139 | 76,558 | + | 139 | putative transposase OrfA(ISCbt5-a)                    | Similar to transposase[Clostridium tetani E88](gil28210546 reflNP_781490.1 )92.1% identity in overlap 139aa                                                                                                                                                                                                           |
| C2P087 | 76,561 | 77,475 | + | 304 | putative transposase OrfB(ISCbt5-a)                    | Similar to transposase[Clostridium tetani E88](gil28210547 reflNP_781491.1 )93.8% identity in overlap 304aa                                                                                                                                                                                                           |
| C2P088 | 77,881 | 77,537 | - | 114 | hypothetical protein                                   |                                                                                                                                                                                                                                                                                                                       |
| C2P089 | 79,675 | 77,996 | - | 559 | conserved hypothetical protein                         | Similar to hypothetical protein pE88_20[Clostridium tetani E88](gil28373149 reflNP_783748.1 )43.9% identity in overlap 570aa                                                                                                                                                                                          |
| C2P090 | 81,393 | 80,788 | - | 201 | putative superoxide dismutase                          | Similar to superoxide dismutase, Mn/Fe family[Clostridium botulinum A str. Hall](gil153936872 reflYP_001386477.1 )48.7% identity in overlap 193aa                                                                                                                                                                     |
| C2P091 | 82,063 | 81,632 | - | 143 | hypothetical protein                                   |                                                                                                                                                                                                                                                                                                                       |
| C2P092 | 82,317 | 82,739 | + | 140 | hypothetical protein                                   |                                                                                                                                                                                                                                                                                                                       |
| C2P093 | 82,968 | 84,221 | + | 417 | putative voltage gated chloride channel family protein | Similar to voltage gated chloride channel family[Clostridium perfringens SM101](gil110803970 reflYP_697884.1 )71.4% identity in overlap 392aa                                                                                                                                                                         |
| C2P094 | 85,142 | 84,222 | - | 306 | conserved hypothetical protein                         | Similar to hypothetical protein Noc_1844[Nitrosococcus oceani ATCC 19707](gil77165316 reflYP_343841.1 )35.8% identity in overlap 307aa                                                                                                                                                                                |
| C2P095 | 86,137 | 85,217 | - | 306 | conserved hypothetical protein                         | Similar to hypothetical protein Noc_1844[Nitrosococcus oceani ATCC 19707](gil77165316 reflYP_343841.1 )32.7% identity in overlap 306aa                                                                                                                                                                                |
| C2P096 | 87,093 | 86,173 | - | 306 | conserved hypothetical protein                         | Similar to hypothetical protein Noc_1844[Nitrosococcus oceani ATCC 19707](gil77165316 reflYP_343841.1 )33.3% identity in overlap 306aa                                                                                                                                                                                |
| C2P097 | 88,381 | 87,458 | - | 307 | conserved hypothetical protein                         | Similar to hypothetical protein Noc_1844[Nitrosococcus oceani ATCC 19707](gil77165316 reflYP_343841.1 )34.3% identity in overlap 306aa                                                                                                                                                                                |
| C2P098 | 88,585 | 88,923 | + | 112 | conserved hypothetical protein                         | Similar to hypothetical protein CPF_0409[Clostridium perfringens ATCC 13124](gil110799856 reflYP_694866.1 )42.5% identity in overlap 106aa                                                                                                                                                                            |
| C2P099 | 89,063 | 89,452 | + | 129 | hypothetical protein                                   |                                                                                                                                                                                                                                                                                                                       |
| C2P100 | 90,881 | 89,517 | - | 454 | putative guanine deaminase                             | Similar to hydroxydechloroatrazine ethylaminohydrolase[Clostridium botulinum B str. Eklund 17B](gil187932710 reflYP_001884832.1 )50.9% identity in overlap 442aa, also similar to putative guanine deaminase[Gluconacetobacter diazotrophicus PAI 5](gil162147516 reflYP_001601977.1 )41.9% identity in overlap 415aa |
| C2P101 | 91,253 | 91,690 | + | 145 | putative MOSC domain-containing protein                | MOSC domain-containing protein[Clostridium botulinum A str. Hall](gil153934901 reflYP_001387738.1 )74.8% identity in overlap 143aa                                                                                                                                                                                    |

|        |         |         |   |     |                                                                 |                                                                                                                                                                                        |
|--------|---------|---------|---|-----|-----------------------------------------------------------------|----------------------------------------------------------------------------------------------------------------------------------------------------------------------------------------|
| C2P102 | 91,776  | 93,119  | + | 447 | putative ABC transporter, xanthine/uracil permease protein      | Similar to xanthine/uracil permease family protein[Clostridium botulinum A str. Hall](gil153934932 reflYYP_001386269.1 )49.6% identity in overlap 421aa                                |
| C2P103 | 93,233  | 93,667  | + | 144 | hypothetical protein                                            |                                                                                                                                                                                        |
| C2P104 | 94,065  | 93,718  | - | 115 | hypothetical protein                                            |                                                                                                                                                                                        |
| C2P105 | 94,457  | 95,407  | + | 316 | putative carbamate kinase                                       | Similar to carbamate kinase[Clostridium botulinum A str. Hall](gil153937097 reflYYP_001388306.1 )76.8% identity in overlap 314aa                                                       |
| C2P106 | 95,654  | 96,673  | + | 339 | putative molybdopterin biosynthesis protein                     | Similar to molybdopterin biosynthesis protein[Clostridium botulinum B1 str. Okra](gil170755241 reflYYP_001780592.1 )47.8% identity in overlap 339aa                                    |
| C2P107 | 96,742  | 97,539  | + | 265 | putative ABC transporter, periplasmic molybdate-binding protein | Similar to molybdate ABC transporter, periplasmic molybdate-binding protein[Clostridium botulinum B str. Eklund 17B](gil187932635 reflYYP_001885587.1 )43.2% identity in overlap 266aa |
| C2P108 | 97,563  | 98,366  | + | 267 | putative ABC transporter, permease protein                      | Similar to putative anion ABC transporter, permease protein[Clostridium botulinum A str. Hall](gil153937035 reflYYP_001386886.1 )47.1% identity in overlap 257aa                       |
| C2P109 | 98,399  | 99,136  | + | 245 | putative ABC transporter, ATP-binding protein                   | Similar to ABC transporter, ATP-binding protein[Clostridium botulinum A str. Hall](gil153936170 reflYYP_001387066.1 )47.5% identity in overlap 238aa                                   |
| C2P110 | 99,186  | 99,920  | + | 244 | conserved hypothetical protein                                  | Similar to hypothetical protein CLC_1020[Clostridium botulinum A str. Hall](gil153935100 reflYYP_001386888.1 )44.7% identity in overlap 237aa                                          |
| C2P111 | 99,945  | 100,433 | + | 162 | putative molybdopterin biosynthesis enzyme Mog                  | Similar to molybdopterin biosynthesis enzyme Mog[Clostridium botulinum A str. Hall](gil153934484 reflYYP_001387743.1 )69.8% identity in overlap 162aa                                  |
| C2P112 | 100,470 | 101,432 | + | 320 | putative molybdenum cofactor biosynthesis protein A             | Similar to molybdenum cofactor biosynthesis protein A[Clostridium botulinum A str. Hall](gil153937083 reflYYP_001387740.1 )59.4% identity in overlap 320aa                             |
| C2P113 | 101,436 | 101,918 | + | 160 | putative molybdenum cofactor biosynthesis protein C             | Similar to molybdenum cofactor biosynthesis protein C[Clostridium botulinum A str. Hall](gil153937145 reflYYP_001387739.1 )68.6% identity in overlap 156aa                             |
| C2P114 | 102,035 | 102,289 | + | 84  | hypothetical protein                                            |                                                                                                                                                                                        |
| C2P115 | 102,502 | 102,720 | + | 72  | hypothetical protein                                            |                                                                                                                                                                                        |
| C2P116 | 103,361 | 102,756 | - | 201 | putative integrase/recombinase                                  | Similar to integrase/recombinase[Clostridium tetani E88](gil28373178 reflNP_783821.1 )66.8% identity in overlap 202aa                                                                  |



|         |         |         |   |     |                                               |                                                                                                                                                  |
|---------|---------|---------|---|-----|-----------------------------------------------|--------------------------------------------------------------------------------------------------------------------------------------------------|
| C2P117  | 103,506 | 103,913 | + | 135 | putative transposase OrfA(ISCbt6-a)           | Similar to transposase[Clostridium tetani E88](gil28210352 ref NP_781296.1 )72.7% identity in overlap 132aa                                      |
| C2P118  | 103,915 | 105,012 | + | 365 | putative transposase OrfB(ISCbt6-a)           | Similar to ISCpe2, transposase orfB[Clostridium perfringens SM101](gil110802662 ref YP_698899.1 )54.3% identity in overlap 385aa                 |
| C2P119  | 105,140 | 105,334 | + | 64  | hypothetical protein                          |                                                                                                                                                  |
| C2P120a | 105,350 | 105,502 | + | 50  | putative ABC transporter, ATP-binding protein | Similar to N-terminus of ABC transporter ATP-binding protein[Clostridium tetani E88](gil28373165 ref NP_783765.1 )52.3% identity in overlap 44aa |
| C2P120b | 105,543 | 105,680 | + | 45  | putative ABC transporter ATP-binding protein  | Similar to C-terminus of ABC transporter ATP-binding protein[Clostridium tetani E88](gil28373165 ref NP_783765.1 )46.2% identity in overlap 39aa |
| C2P121  | 105,681 | 106,073 | + | 130 | conserved hypothetical protein                | Similar to lipoprotein, putative[Clostridium novyi NT](gil118444739 ref YP_878536.1 )52.0% identity in overlap 123aa                             |
| C2P122  | 106,554 | 106,282 | - | 90  | hypothetical protein                          |                                                                                                                                                  |
| C2P123  | 106,868 | 106,671 | - | 65  | hypothetical protein                          |                                                                                                                                                  |

---







---
