# Supplementary material
Source: PubMed Central journal article supplement (PMC2687166)
Supplement: supp_191_10_3282__3.pdf [file supp_191_10_3282__3.pdf]

**Table 3. The summary of PCR scanning analysis of C-ST, C-468, D-1873, (C)-AO2, and D-4947 genomes based on the (C)-203U28 sequence**

| ORF name | Forward primer | Reverse primer | Location (5') of forward primer | Location (5') of reverse primer | Length, bp | C-ST | C-468 | D-1873 | (C)-AO2 | D-4947 |
|----------|----------------|----------------|---------------------------------|---------------------------------|------------|------|-------|--------|---------|--------|
| C2P001   | C203-124f      | C203-129r      | 559                             | 1,268                           | 710        | A    | A     | A      | X       | X      |
| C2P002   | C203-101f      | C203-110r      | 1,942                           | 2,198                           | 257        | X    | X     | A      | X       | X      |
| C2P003   | C203-105f      | C203-105r      | 2,857                           | 3,385                           | 529        | X    | X     | A      | X       | X      |
| C2P004   | C203-246f      | C203-263r      | 4,058                           | 4,544                           | 487        | X    | X     | A      | X       | X      |
| C2P005   | C203-100f      | C203-264r      | 5,537                           | 6,094                           | 558        | X    | X     | A      | X       | X      |
| C2P015   | C203-251f      | C203-265r      | 11,690                          | 12,115                          | 426        | A    | A     | X      | X       | X      |
| C2P020   | C203-247f      | C203-266r      | 16,328                          | 16,722                          | 395        | A    | A     | X      | X       | X      |
| C2P025   | C203-163f      | C203-69r       | 20,371                          | 21,553                          | 1,183      | X    | X     | X      | X       | X      |
| C2P030   | C203-252f      | C203-267r      | 26,282                          | 26,807                          | 526        | A    | A     | A      | X       | X      |
| C2P034   | C203-223f      | C203-268r      | 28,717                          | 29,340                          | 624        | X    | X     | A      | X       | X      |
| C2P038   | C203-248f      | C203-269r      | 30,786                          | 30,977                          | 192        | X    | X     | A      | X       | X      |
| C2P042   | C203-249f      | C203-270r      | 33,457                          | 34,094                          | 638        | X    | X     | A      | X       | X      |
| C2P052   | C203-253f      | C203-272r      | 40,909                          | 41,375                          | 467        | A    | A     | A      | X       | X      |
| C2P056   | C2-8f          | C2.c-IR2       | 44,259                          | 45,021                          | 763        | A    | A     | A      | X       | X      |
| C2P058   | C203-250f      | C203-20r       | 48,479                          | 48,886                          | 408        | A    | A     | A      | X       | X      |
| C2P061   | C203-19f       | C203-26f       | 50,525                          | 51,181                          | 657        | A    | A     | A      | X       | X      |
| C2P064   | C203-39f       | C203-55r       | 52,831                          | 53,230                          | 400        | A    | A     | A      | X       | X      |
| C2P067   | C203-38f       | C203-77r       | 55,442                          | 56,935                          | 1,494      | A    | A     | A      | X       | X      |
| C2P072   | C203-72f       | C203-140r      | 61,243                          | 63,035                          | 1,793      | A    | A     | A      | X       | X      |
| C2P074   | C203-88f       | C203-124r      | 64,098                          | 65,629                          | 1,532      | A    | A     | A      | X       | X      |
| C2P077   | C203-115f      | C203-112r      | 67,696                          | 68,287                          | 592        | A    | A     | A      | X       | X      |
| C2P081   | C203-136f      | C203-190r      | 72,622                          | 73,427                          | 806        | A    | A     | A      | X       | X      |
| C2P089   | C203-167f      | C203-200r      | 78,406                          | 79,289                          | 884        | A    | A     | A      | X       | X      |
| C2P096   | C203-211f      | C203-222r      | 86,274                          | 87,038                          | 765        | A    | A     | A      | X       | X      |
| C2P100   | C203-199f      | C203-228r      | 89,650                          | 90,615                          | 966        | A    | A     | A      | X       | X      |
| C2P102   | C203-208f      | C203-220r      | 92,088                          | 93,057                          | 970        | A    | A     | A      | X       | X      |
| C2P106   | C203-193f      | C203-195r      | 95,684                          | 96,542                          | 859        | A    | A     | A      | X       | X      |
| C2P112   | C203-177f      | C203-184r      | 100,924                         | 101,249                         | 326        | A    | A     | A      | X       | X      |
| C2P116   | C203-160f      | C203-262r      | 102,758                         | 103,325                         | 568        | A    | A     | A      | X       | X      |

A, a PCR product with the same length as that from (C)-203U28 was amplified.

X, no PCR product was obtained.
